# Supplementary material for: Ex Vivo Model of Neuroblastoma Plasticity
Source: MDPI journal article supplement (doi:10.3390/cancers15041274), 2023-02-17
Supplement: s1 [file s1]

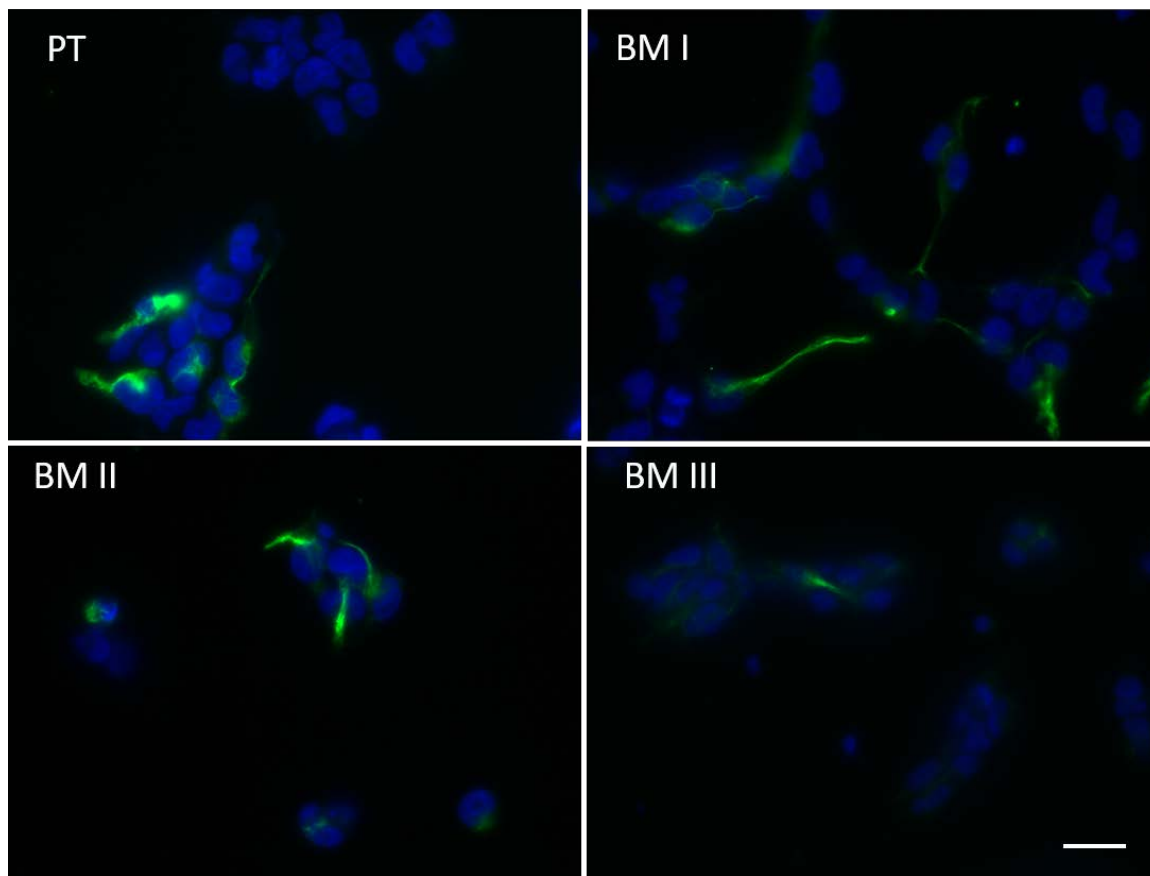

**Figure S1: NFL-staining in NB-cells.** Cells were treated with an Alexa-fluor488-coupled antibody against NFL (green) and the nuclei were stained with DAPI (blue). Shown is one representative image. Bar: 10  $\mu$ M

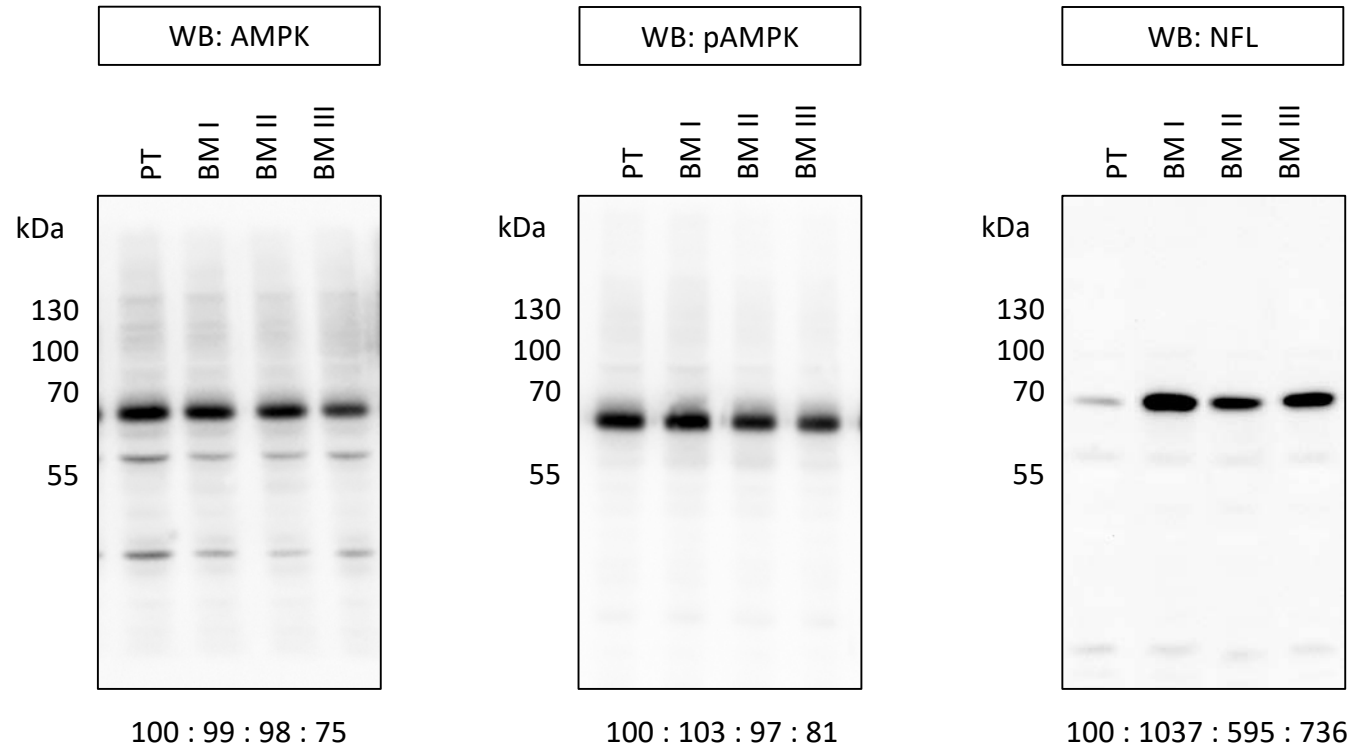

**Figure S2. Original Western-blot.** 20  $\mu$ g protein extracts from NB cells were probed against AMPK, pAMPK or NFL by Western-blotting. Band intensities were measured by Image J, and the intensities obtained for the PT signals were set to 100%. Show is one representative Western-blot each out of three.

| Pathway                                                                                                  | PT vs BM I                           | PT vs BM II                         | PT vs BM III               |
|----------------------------------------------------------------------------------------------------------|--------------------------------------|-------------------------------------|----------------------------|
| MAPK<br><a href="#">MAPK signaling pathway (Homo sapiens) - WikiPathways</a>                             | up: 3, down: 2<br>p = 0.84           | up: 7, down: 0<br>p = 0.85          | up: 4, down: 2<br>p = 0.83 |
| PI3K/Akt<br><a href="#">PI3K-Akt signaling pathway (Homo sapiens) - WikiPathways</a>                     | up: 4, down: 0<br>p = 0.16           | up: 2, down: 1<br><b>p = 0.022*</b> | no changes                 |
| JAK/STAT<br><a href="#">JAK/STAT pathway (Homo sapiens) - WikiPathways</a>                               | up: 0, down: 4<br>p = 0.35           | up: 0, down: 1<br>p = 0.38          | no changes                 |
| Wnt<br><a href="#">Wnt signaling (Homo sapiens) - WikiPathways</a>                                       | up: 1, down: 1                       | up:1; down: 0<br>p = 0.27           | up: 1, down: 1             |
| TGF-beta<br><a href="#">TGF-beta signaling pathway (Homo sapiens) - WikiPathways</a>                     | up: 1, down: 0<br>p = 0.27           | Up:1, down: 1<br>p = 0.45           | no changes                 |
| VEGF<br><a href="#">VEGFA-VEGFR2 signaling pathway (Homo sapiens) - WikiPathways</a>                     | up: 0, down: 1<br><b>p = 0.0003*</b> | up: 3, down: 2<br><b>p = 0.022*</b> | Up: 4; down: 1<br>p = 0.14 |
| EGF<br><a href="#">EGF/EGFR signaling pathway (Homo sapiens) - WikiPathways</a>                          | up: 1, down: 1<br>p = 0.45           | up: 1, down: 2<br>p = 0.64          | no changes                 |
| Integrin signaling<br><a href="#">Integrin signaling (Homo sapiens) - WikiPathways</a>                   | up: 1, down 0                        | no changes                          | no changes                 |
| Hedgehog<br><a href="#">Hedgehog signaling pathway (Homo sapiens) - WikiPathways</a>                     | no changes                           | no changes                          | no changes                 |
| Hippo<br><a href="#">Hippo-Merlin signaling dysregulation (Homo sapiens) - WikiPathways</a>              | up: 2, down: 1                       | up: 1, down 0<br>p = 0.53           | no changes                 |
| Notch<br><a href="#">Notch signaling (Homo sapiens) - WikiPathways</a>                                   | no changes                           | no changes                          | no changes                 |
| Toll-like receptor<br><a href="#">Toll-like receptor signaling pathway (Homo sapiens) - WikiPathways</a> | up: 2, down: 0                       | no changes                          | no changes                 |
| RHO GTPase signaling                                                                                     | no changes                           | no changes                          | no changes                 |

|                                                                                                        |                            |                            |               |
|--------------------------------------------------------------------------------------------------------|----------------------------|----------------------------|---------------|
| <a href="#">Signaling by Rho GTPases (Homo sapiens) - WikiPathways</a>                                 |                            |                            |               |
| GPCRs<br><a href="#">GPCRs. class A rhodopsin-like (Homo sapiens) - WikiPathways</a>                   | up: 3, down: 1<br>p = 0.42 | up: 3, down: 5<br>p = 0.85 | up = 3 down 2 |
| Erythropoietin signalling<br><a href="#">Signaling by Erythropoietin (Homo sapiens) - WikiPathways</a> | no changes                 | no changes                 | no changes    |
